# Supplementary material for: A Highly Sensitive Cell-Based TLR Reporter Platform for the Specific Detection of Bacterial TLR Ligands
Source: PubMed Central journal article supplement (PMC8786796; doi:10.3389/fimmu.2021.817604), 2022-01-11

# LPS-B5 ultrapure vs. MPLA-SM

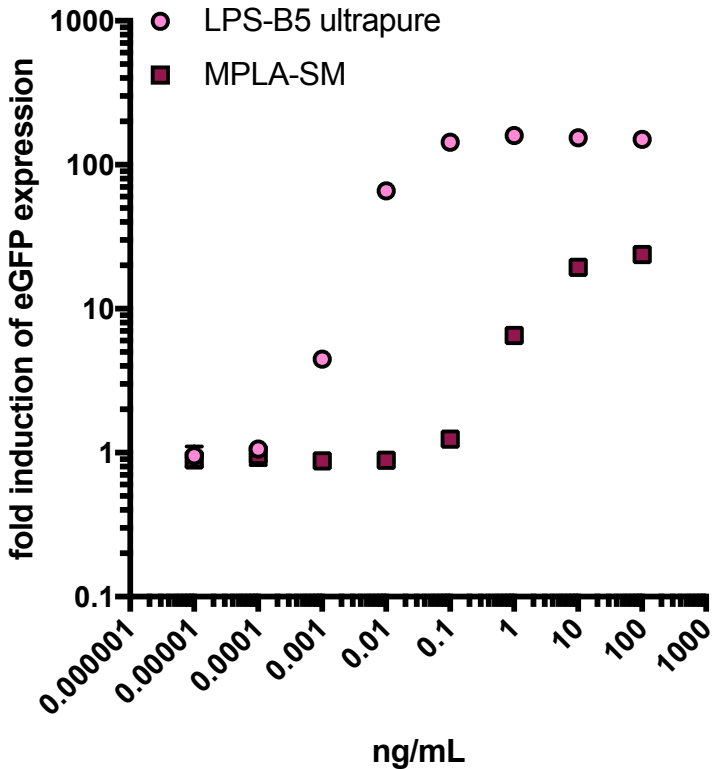

Supplement: Image_1.pdf [file Image_1.pdf]
